# Supplementary material for: The Effects of Modified Atmosphere Packaging on the Quality Properties of Water Buffalo Milk’s Concentrated Cream
Source: MDPI journal article supplement (doi:10.3390/molecules28031310), 2023-01-30
Supplement: s1 [file s1]

**Table S1.** The color characteristics (L\*, a\*, b\*, ΔE) of the CC samples.

| Storage Time (day) |                            |                             |                              |                             |                             |
|--------------------|----------------------------|-----------------------------|------------------------------|-----------------------------|-----------------------------|
|                    | Initial sample*            | 7                           | 14                           | 21                          | 28                          |
| L* value           |                            |                             |                              |                             |                             |
| MAP1               | 94,340±0,276 <sup>Aa</sup> | 92,581±2,763 <sup>Aa</sup>  | 91,776±1,222 <sup>Aa</sup>   | 93,184±0,388 <sup>Aa</sup>  | 91,508±2,656 <sup>Aab</sup> |
| MAP2               | 94,340±0,276 <sup>Aa</sup> | 92,694±1,953 <sup>Aa</sup>  | 93,023±0,648 <sup>Aa</sup>   | 94,251±0,692 <sup>Aa</sup>  | 93,793±0,854 <sup>Aa</sup>  |
| Control            | 94,340±0,276 <sup>Aa</sup> | 93,468±1,784 <sup>ABa</sup> | 90,815±0,502 <sup>ABCa</sup> | 89,322±1,431 <sup>BCb</sup> | 87,380±0,255 <sup>Cb</sup>  |
| a* value           |                            |                             |                              |                             |                             |
| MAP1               | -2,978±0,025 <sup>Aa</sup> | -3,262±0,295 <sup>Aa</sup>  | -3,209±0,254 <sup>Aa</sup>   | -3,164±0,265 <sup>Aa</sup>  | -3,110±0,229 <sup>Ab</sup>  |
| MAP2               | -2,978±0,025 <sup>Aa</sup> | -3,244±0,136 <sup>Aa</sup>  | -3,258±0,111 <sup>Aa</sup>   | -3,180±0,137 <sup>Aa</sup>  | -3,062±0,061 <sup>Ab</sup>  |
| Control            | -2,978±0,025 <sup>Aa</sup> | -3,462±0,021 <sup>Aa</sup>  | -2,218±1,299 <sup>Aa</sup>   | -1,587±0,825 <sup>Aa</sup>  | 0,168±1,586 <sup>Aa</sup>   |
| b* value           |                            |                             |                              |                             |                             |
| MAP1               | 5,58±0,33 <sup>Ba</sup>    | 6,22±0,57 <sup>Bb</sup>     | 8,57±0,39 <sup>Ab</sup>      | 8,66±0,43 <sup>Ab</sup>     | 9,15±0,14 <sup>Ab</sup>     |
| MAP2               | 5,58±0,33 <sup>Ca</sup>    | 7,48±0,06 <sup>Ba</sup>     | 8,48±0,30 <sup>ABb</sup>     | 8,22±0,34 <sup>ABb</sup>    | 9,05±0,42 <sup>Ab</sup>     |
| Control            | 5,58±0,33 <sup>Ca</sup>    | 7,68±0,16 <sup>Ca</sup>     | 15,96±0,88 <sup>Ba</sup>     | 21,98±1,00 <sup>Aa</sup>    | 25,16±0,14 <sup>Aa</sup>    |
| ΔE value           |                            |                             |                              |                             |                             |
| MAP1               | 0                          | 2,322±1,283 <sup>Ba</sup>   | 3,999±0,559 <sup>Bb</sup>    | 3,184±0,230 <sup>Db</sup>   | 4,717±1,807 <sup>Ab</sup>   |
| MAP2               | 0                          | 2,911±0,074 <sup>Ca</sup>   | 3,092±0,565 <sup>Ba</sup>    | 2,487±0,251 <sup>DEb</sup>  | 3,389±0,211 <sup>ABb</sup>  |
| Control            | 0                          | 2,725±0,896 <sup>Ca</sup>   | 11,099±0,767 <sup>Ca</sup>   | 17,075±1,474 <sup>Ba</sup>  | 20,704±1,880 <sup>Aa</sup>  |

\* The initial sample was analyzed before any application.

<sup>A-B</sup> For each application, different superscript uppercase letters show differences between the samples (P < 0.05).

<sup>a-b</sup> Different superscript lowercase letters show differences between the storage times (P < 0.05).

**Table S2.** Fatty acid compositions (%) of CC samples (mean  $\pm$  standard deviations, n = 2).

| Initial sample* |                                 | 28 <sup>th</sup> day** |                                  |
|-----------------|---------------------------------|------------------------|----------------------------------|
| C4              | 4,129 $\pm$ 0,161               | MAP1                   | 3,924 $\pm$ 0,010 <sup>A</sup>   |
|                 |                                 | MAP2                   | 3,916 $\pm$ 0,026 <sup>A</sup>   |
|                 |                                 | Control                | 3,829 $\pm$ 0,014 <sup>B</sup>   |
| C6              | 2,083 $\pm$ 0,079               | MAP1                   | 1,991 $\pm$ 0,005 <sup>A</sup>   |
|                 |                                 | MAP2                   | 1,998 $\pm$ 0,010 <sup>A</sup>   |
|                 |                                 | Control                | 1,968 $\pm$ 0,017 <sup>A</sup>   |
| C8              | 1,094 $\pm$ 0,041               | MAP1                   | 1,052 $\pm$ 0,004 <sup>A</sup>   |
|                 |                                 | MAP2                   | 1,059 $\pm$ 0,002 <sup>A</sup>   |
|                 |                                 | Control                | 1,035 $\pm$ 0,005 <sup>B</sup>   |
| C10             | 2,021 $\pm$ 0,063               | MAP1                   | 1,962 $\pm$ 0,001 <sup>AB</sup>  |
|                 |                                 | MAP2                   | 1,978 $\pm$ 0,009 <sup>A</sup>   |
|                 |                                 | Control                | 1,944 $\pm$ 0,007 <sup>B</sup>   |
| C12             | 2,617 $\pm$ 0,069               | MAP1                   | 2,573 $\pm$ 0,006 <sup>A</sup>   |
|                 |                                 | MAP2                   | 2,569 $\pm$ 0,017 <sup>A</sup>   |
|                 |                                 | Control                | 2,573 $\pm$ 0,021 <sup>A</sup>   |
| C14             | 12,304 $\pm$ 0,234              | MAP1                   | 12,354 $\pm$ 0,098 <sup>A</sup>  |
|                 |                                 | MAP2                   | 12,447 $\pm$ 0,022 <sup>A</sup>  |
|                 |                                 | Control                | 12,500 $\pm$ 0,006 <sup>A</sup>  |
| C14.1           | 0,890 $\pm$ 0,014               | MAP1                   | 0,892 $\pm$ 0,006 <sup>A</sup>   |
|                 |                                 | MAP2                   | 0,892 $\pm$ 0,004 <sup>A</sup>   |
|                 |                                 | Control                | 0,860 $\pm$ 0,004 <sup>B</sup>   |
| C15             | 1,544 $\pm$ 0,006 <sup>b</sup>  | MAP1                   | 1,568 $\pm$ 0,001 <sup>Aa</sup>  |
|                 |                                 | MAP2                   | 1,573 $\pm$ 0,008 <sup>Aa</sup>  |
|                 |                                 | Control                | 1,573 $\pm$ 0,003 <sup>Aa</sup>  |
| C16             | 35,233 $\pm$ 0,187 <sup>b</sup> | MAP1                   | 35,594 $\pm$ 0,233 <sup>A</sup>  |
|                 |                                 | MAP2                   | 35,357 $\pm$ 0,497 <sup>A</sup>  |
|                 |                                 | Control                | 36,115 $\pm$ 0,122 <sup>Aa</sup> |
| C16.1           | 2,962 $\pm$ 0,020               | MAP1                   | 2,930 $\pm$ 0,001 <sup>B</sup>   |
|                 |                                 | MAP2                   | 2,976 $\pm$ 0,013 <sup>A</sup>   |
|                 |                                 | Control                | 2,918 $\pm$ 0,008 <sup>B</sup>   |
| C17             | 0,852 $\pm$ 0,002               | MAP1                   | 0 $\pm$ 0                        |
|                 |                                 | MAP2                   | 0 $\pm$ 0                        |
|                 |                                 | Control                | 0 $\pm$ 0                        |
| C17.1           | 0,375 $\pm$ 0,001               | MAP1                   | 0,372 $\pm$ 0,001 <sup>B</sup>   |
|                 |                                 | MAP2                   | 0,379 $\pm$ 0,001 <sup>A</sup>   |
|                 |                                 | Control                | 0,371 $\pm$ 0,001 <sup>B</sup>   |
| C18             | 8,272 $\pm$ 0,077 <sup>b</sup>  | MAP1                   | 8,528 $\pm$ 0,074 <sup>A</sup>   |
|                 |                                 | MAP2                   | 8,590 $\pm$ 0,048 <sup>Aa</sup>  |
|                 |                                 | Control                | 8,698 $\pm$ 0,034 <sup>Aa</sup>  |
| C18.1 T         | 1,205 $\pm$ 0,010               | MAP1                   | 1,256 $\pm$ 0,021 <sup>A</sup>   |
|                 |                                 | MAP2                   | 1,343 $\pm$ 0,154 <sup>A</sup>   |
|                 |                                 | Control                | 1,338 $\pm$ 0,145 <sup>A</sup>   |
| C18.1 C         | 17,949 $\pm$ 0,112              | MAP1                   | 17,938 $\pm$ 0,014 <sup>B</sup>  |
|                 |                                 | MAP2                   | 18,213 $\pm$ 0,004 <sup>A</sup>  |
|                 |                                 | Control                | 17,778 $\pm$ 0,062 <sup>C</sup>  |
| C18.2 T         | 0,144 $\pm$ 0,000 <sup>a</sup>  | MAP1                   | 0,144 $\pm$ 0,001 <sup>A</sup>   |
|                 |                                 | MAP2                   | 0,141 $\pm$ 0,003 <sup>A</sup>   |

|                 |                          |         |                           |
|-----------------|--------------------------|---------|---------------------------|
|                 |                          | Control | 0,138±0,001 <sup>Ab</sup> |
| <b>C18.2 C</b>  | 1,068±0,007 <sup>a</sup> | MAP1    | 1,054±0,011 <sup>A</sup>  |
|                 |                          | MAP2    | 1,077±0,021 <sup>A</sup>  |
|                 |                          | Control | 1,034±0,006 <sup>Ab</sup> |
| <b>C18.3</b>    | 0,210±0,004 <sup>b</sup> | MAP1    | 0,221±0,003 <sup>Ba</sup> |
|                 |                          | MAP2    | 0,221±0,000 <sup>Ba</sup> |
|                 |                          | Control | 0,232±0,002 <sup>Aa</sup> |
| <b>C18.3 N6</b> | 0±0                      | MAP1    | 0,123±0,001 <sup>A</sup>  |
|                 |                          | MAP2    | 0,120±0,001 <sup>B</sup>  |
|                 |                          | Control | 0,117±0,000 <sup>C</sup>  |
| <b>C20.1</b>    | 0,411±0,002 <sup>a</sup> | MAP1    | 0,403±0,001 <sup>Ab</sup> |
|                 |                          | MAP2    | 0,408±0,001 <sup>A</sup>  |
|                 |                          | Control | 0,390±0,004 <sup>Bb</sup> |
| <b>C20.3 N3</b> | 0,116±0,00               | MAP1    | 0,127±0,002 <sup>A</sup>  |
|                 |                          | MAP2    | 0,125±0,002 <sup>A</sup>  |
|                 |                          | Control | 0,142±0,014 <sup>A</sup>  |
| <b>C20.4</b>    | 0,175±0,037 <sup>a</sup> | MAP1    | 0,111±0,004 <sup>A</sup>  |
|                 |                          | MAP2    | 0,071±0,008 <sup>Bb</sup> |
|                 |                          | Control | 0,077±0,002 <sup>Bb</sup> |
| <b>C20.5</b>    | 0,007±0,009              | MAP1    | 0,014±0,000 <sup>A</sup>  |
|                 |                          | MAP2    | 0,019±0,001 <sup>A</sup>  |
|                 |                          | Control | 0,017±0,003 <sup>A</sup>  |
| <b>C24</b>      | 0,059±0,001 <sup>a</sup> | MAP1    | 0,059±0,001 <sup>A</sup>  |
|                 |                          | MAP2    | 0,059±0,001 <sup>A</sup>  |
|                 |                          | Control | 0,056±0,000 <sup>Bb</sup> |
| <b>SFA</b>      | 70,205±0,763             | MAP1    | 69,603±0,394 <sup>A</sup> |
|                 |                          | MAP2    | 69,543±0,354 <sup>A</sup> |
|                 |                          | Control | 70,290±0,187 <sup>A</sup> |
| <b>UFA</b>      | 25,511±0,084             | MAP1    | 25,581±0,037 <sup>A</sup> |
|                 |                          | MAP2    | 25,981±0,169 <sup>A</sup> |
|                 |                          | Control | 25,410±0,237 <sup>A</sup> |
| <b>MUFA</b>     | 23,792±0,115             | MAP1    | 23,789±0,027 <sup>A</sup> |
|                 |                          | MAP2    | 24,209±0,139 <sup>A</sup> |
|                 |                          | Control | 23,654±0,225 <sup>A</sup> |
| <b>PUFA</b>     | 1,719±0,031              | MAP1    | 1,792±0,010 <sup>A</sup>  |
|                 |                          | MAP2    | 1,772±0,030 <sup>A</sup>  |
|                 |                          | Control | 1,756±0,012 <sup>A</sup>  |

\* The initial sample was analyzed before any application. \*\* FA analysis values of MAP1, MAP2, and Control samples at the end of storage.

<sup>A-B</sup> For each application, different superscript uppercase letters show differences between the samples (P < 0.05).

<sup>a-b</sup> Different superscript lowercase letters show differences between the storage times (P < 0.05).

If there was no statistical difference, lowercase and uppercase superscript were not used.

SFA: Saturated fatty acids, MUFA: Mono-unsaturated fatty acids, PUFA: Poly-unsaturated fatty acids.

**Table S3.** Free fatty acid concentrations (mg/kg) of CC samples (mean  $\pm$  standard deviations, n = 2).

| Initial sample* |                                 | 28 <sup>th</sup> day** |                                    |
|-----------------|---------------------------------|------------------------|------------------------------------|
| <b>C:4</b>      | 0 <sup>b</sup>                  | MAP1                   | 3,00 $\pm$ 1,57 <sup>Ba</sup>      |
|                 |                                 | MAP2                   | 0 <sup>B</sup>                     |
|                 |                                 | Control                | 70,31 $\pm$ 14,40 <sup>Aa</sup>    |
| <b>C:6</b>      | 0 <sup>b</sup>                  | MAP1                   | 3,40 $\pm$ 0,27 <sup>Ba</sup>      |
|                 |                                 | MAP2                   | 0 <sup>B</sup>                     |
|                 |                                 | Control                | 19,16 $\pm$ 2,80 <sup>Aa</sup>     |
| <b>C:8</b>      | 0 <sup>b</sup>                  | MAP1                   | 6,85 $\pm$ 0,60 <sup>B</sup>       |
|                 |                                 | MAP2                   | 0 <sup>B</sup>                     |
|                 |                                 | Control                | 27,30 $\pm$ 6,80 <sup>Aa</sup>     |
| <b>C:10</b>     | 0,94 $\pm$ 0,04 <sup>b</sup>    | MAP1                   | 32,75 $\pm$ 4,60 <sup>Ba</sup>     |
|                 |                                 | MAP2                   | 20,29 $\pm$ 4,06 <sup>Ba</sup>     |
|                 |                                 | Control                | 294,87 $\pm$ 5,44 <sup>Aa</sup>    |
| <b>C:12</b>     | 26,73 $\pm$ 7,50 <sup>b</sup>   | MAP1                   | 39,29 $\pm$ 5,71 <sup>B</sup>      |
|                 |                                 | MAP2                   | 25,91 $\pm$ 2,44 <sup>B</sup>      |
|                 |                                 | Control                | 359,62 $\pm$ 2,72 <sup>Aa</sup>    |
| <b>C:14</b>     | 88,61 $\pm$ 21,38 <sup>b</sup>  | MAP1                   | 110,67 $\pm$ 9,42 <sup>B</sup>     |
|                 |                                 | MAP2                   | 63,09 $\pm$ 3,30 <sup>C</sup>      |
|                 |                                 | Control                | 1041,03 $\pm$ 9,07 <sup>Aa</sup>   |
| <b>C:15</b>     | 0 <sup>b</sup>                  | MAP1                   | 0 <sup>B</sup>                     |
|                 |                                 | MAP2                   | 0 <sup>B</sup>                     |
|                 |                                 | Control                | 97,44 $\pm$ 10,88 <sup>Aa</sup>    |
| <b>C:16</b>     | 459,72 $\pm$ 39,34 <sup>b</sup> | MAP1                   | 513,40 $\pm$ 15,00 <sup>B</sup>    |
|                 |                                 | MAP2                   | 347,93 $\pm$ 9,08 <sup>B</sup>     |
|                 |                                 | Control                | 2203,85 $\pm$ 81,59 <sup>Aa</sup>  |
| <b>C:16.1</b>   | 0 <sup>b</sup>                  | MAP1                   | 57,13 $\pm$ 9,71 <sup>Ba</sup>     |
|                 |                                 | MAP2                   | 17,52 $\pm$ 9,58 <sup>C</sup>      |
|                 |                                 | Control                | 722,44 $\pm$ 2,72 <sup>Aa</sup>    |
| <b>C:18</b>     | 193,50 $\pm$ 10,34 <sup>b</sup> | MAP1                   | 233,62 $\pm$ 3,55 <sup>Ba</sup>    |
|                 |                                 | MAP2                   | 139,28 $\pm$ 0,10 <sup>Cc</sup>    |
|                 |                                 | Control                | 639,10 $\pm$ 24,48 <sup>Aa</sup>   |
| <b>C:18.1</b>   | 172,49 $\pm$ 43,03 <sup>b</sup> | MAP1                   | 490,79 $\pm$ 82,48 <sup>Ba</sup>   |
|                 |                                 | MAP2                   | 146,07 $\pm$ 16,19 <sup>B</sup>    |
|                 |                                 | Control                | 5892,31 $\pm$ 137,80 <sup>Aa</sup> |
| <b>C:18.2</b>   | 0 <sup>b</sup>                  | MAP1                   | 24,69 $\pm$ 5,31 <sup>Ba</sup>     |
|                 |                                 | MAP2                   | 0 <sup>C</sup>                     |
|                 |                                 | Control                | 241,03 $\pm$ 3,63 <sup>Aa</sup>    |
| <b>SFFA</b>     | 791,09 $\pm$ 79,88 <sup>b</sup> | MAP1                   | 942,75 $\pm$ 33,38 <sup>B</sup>    |
|                 |                                 | MAP2                   | 596,50 $\pm$ 13,90 <sup>C</sup>    |
|                 |                                 | Control                | 4752,67 $\pm$ 64,84 <sup>Aa</sup>  |
| <b>MUFFA</b>    | 172,49 $\pm$ 43,03 <sup>b</sup> | MAP1                   | 547,92 $\pm$ 92,20 <sup>Ba</sup>   |
|                 |                                 | MAP2                   | 163,59 $\pm$ 25,76 <sup>B</sup>    |
|                 |                                 | Control                | 6614,74 $\pm$ 140,52 <sup>Aa</sup> |
| <b>PUFFA</b>    | 0 <sup>b</sup>                  | MAP1                   | 24,69 $\pm$ 5,31 <sup>Ba</sup>     |
|                 |                                 | MAP2                   | 0 <sup>C</sup>                     |
|                 |                                 | Control                | 241,03 $\pm$ 3,63 <sup>Aa</sup>    |

\* The initial sample was analyzed before any application. \*\* FFA analysis values of MAP1, MAP2, and Control samples at the end of storage.

<sup>A-B</sup> For each application, different superscript uppercase letters show differences between the samples (P < 0.05).

<sup>a-b</sup> Different superscript lowercase letters show differences between the storage times ( $P < 0.05$ ).

If there was no statistical difference, lowercase and uppercase superscript were not used.

SFFA: Saturated free fatty acids, MUFFA: Mono-unsaturated free fatty acids, PUFFA: Poly-unsaturated free fatty acids.
